# Supplementary material
Source: Copernicus journal article supplement (doi:10.5194/egusphere-2026-1761)
Supplement: Supplementary file 1 [file egusphere-2026-1761-supplement.pdf]

**Table S1** Soil electrochemical properties under biochar treatment for 365 days

| Treatment | SCN (cmol(c) kg <sup>-1</sup> ) | SSA (m <sup>2</sup> g <sup>-1</sup> ) | $\sigma_0$ (c m <sup>-2</sup> ) |
|-----------|---------------------------------|---------------------------------------|---------------------------------|
| CK        | 18.90±0.88d                     | 41.75±2.34e                           | 0.44±0.04a                      |
| M1        | 21.23±0.49c                     | 51.05±3.83d                           | 0.40±0.02ab                     |
| M3        | 22.26±1.41c                     | 54.72±6.84d                           | 0.39±0.03b                      |
| M5        | 24.74±0.70b                     | 61.71±4.45c                           | 0.39±0.02b                      |
| M10       | 28.09±1.16a                     | 70.81±3.98ab                          | 0.38±0.01b                      |
| W1        | 21.81±0.83c                     | 52.29±0.65d                           | 0.40±0.02ab                     |
| W3        | 22.43±0.39c                     | 55.30±2.30d                           | 0.39±0.01b                      |
| W5        | 26.12±0.65b                     | 64.88±3.73bc                          | 0.39±0.03b                      |
| W10       | 29.34±0.76a                     | 72.96±1.79a                           | 0.39±0.01b                      |

Note: M1, M3, M5, M10, add 1%, 3%, 5%, 10% maize straw biochar; W1, W3, W5, W10, add 1%, 3%, 5%, 10% wheat straw biochar; CEC: cation exchange capacity, SSA: specific surface area,  $\sigma_0$ : surface charge density; Values are means ± stand deviation (n = 3).

**Figure S1** Effect of biochar addition on soil active organic carbon fractions after 365 days. M1, M3, M5, M10, add 1%, 3%, 5%, 10% maize straw biochar; W1, W3, W5, W10, add 1%, 3%, 5%, 10% wheat straw biochar.

**Figure S2** Soil aggregate breaking strength ( $< 5 \mu\text{m}$ ,  $< 10 \mu\text{m}$ ) at different electrolyte concentrations under biochar addition after 365 days of incubation. M1, M3, M5, M10, add 1%, 3%, 5%, 10% maize straw biochar; W1, W3, W5, W10, add 1%, 3%, 5%, 10% wheat straw biochar.

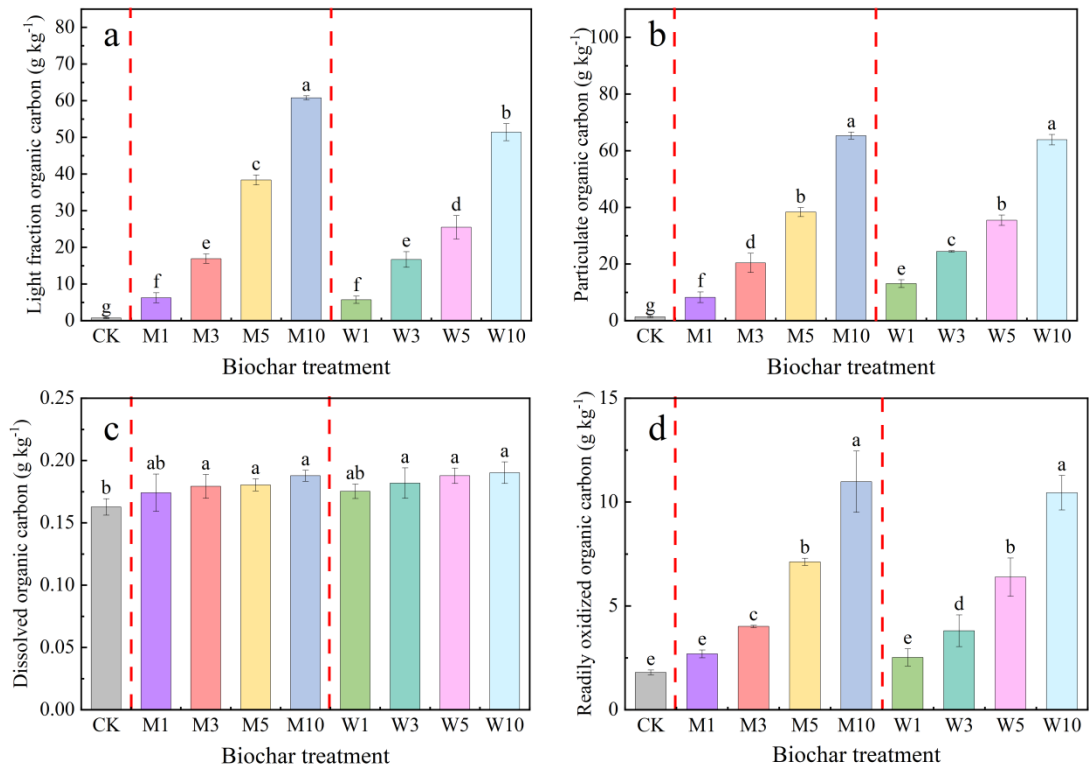

**Fig. S1.** Effect of biochar addition on soil active organic carbon fractions after 365 days.

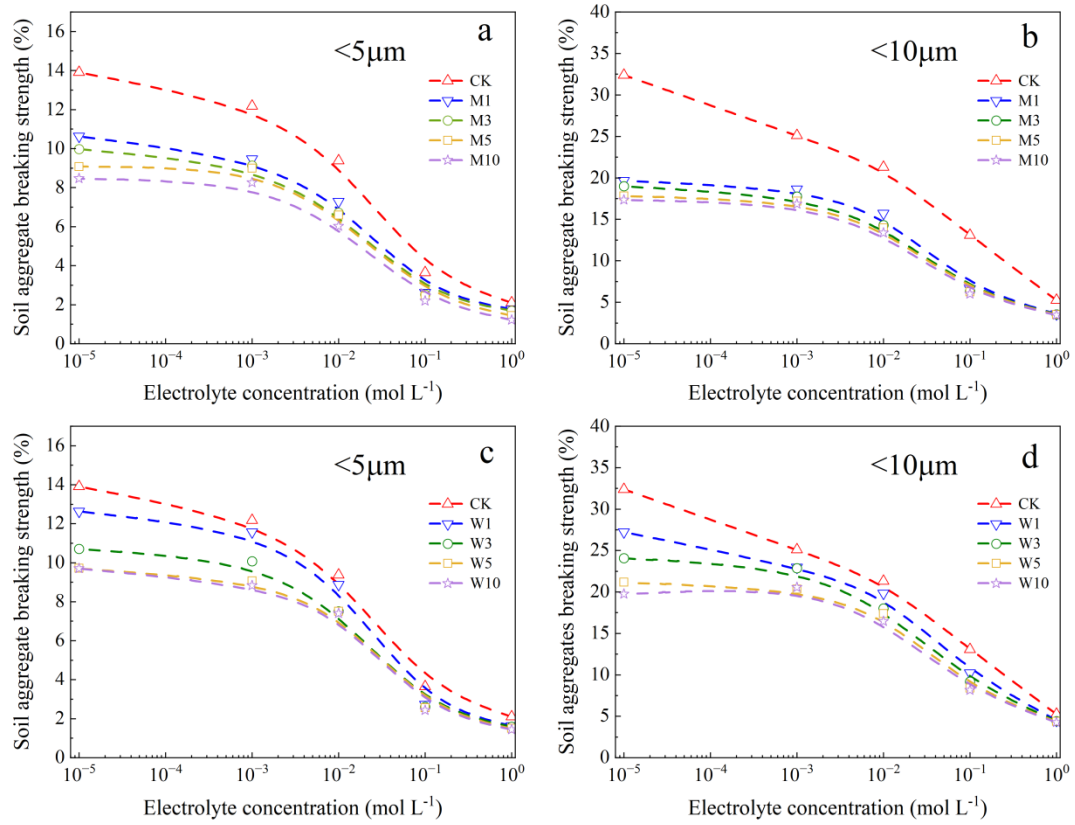

**Fig. S2.** Soil aggregate breaking strength (< 5 μm, < 10 μm) at different electrolyte concentrations under biochar addition after 365 days of incubation.
